# Supplementary material for: Chiral determination of 3,4-methylenedioxypyrovalerone enantiomers in rat serum
Source: Royal Society of Chemistry journal article supplement (doi:10.1039/c6ay03176e), 2016-12-22
Supplement: c6ay03176e1.pdf [file c6ay03176e1.pdf]

## Supplemental

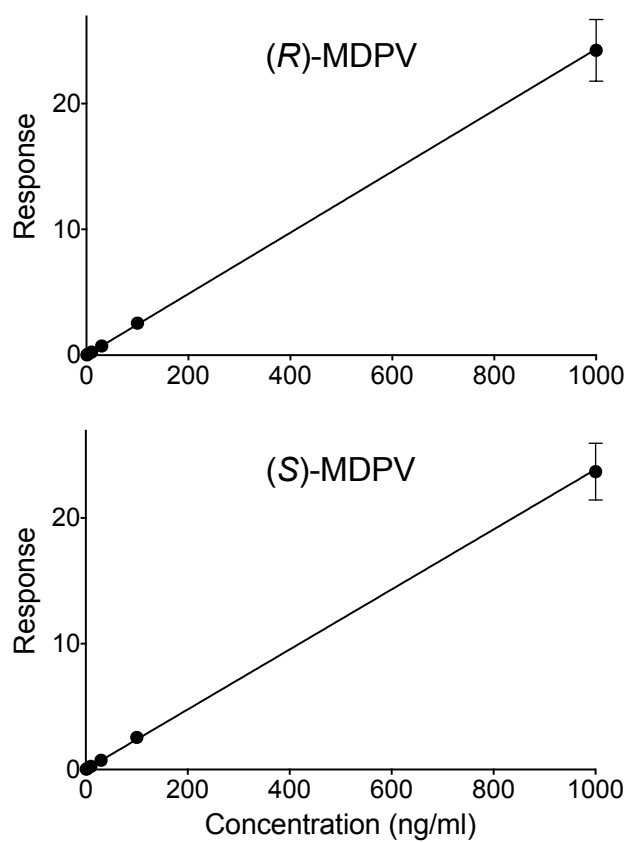

**Supplemental 1.** Average validation calibration curves for (R)- and (S)-MDPV  $\pm$  SD. Response curves were generated using a 1/x weighted linear least squares fit to the response versus concentration data.
